# Supplementary material
Source: Springer Nature journal article supplement (https://www.springermedizin.de/resource/supplementary/13075_2009_2756_MOESM2_ESM.pdf/9692820)

(a)

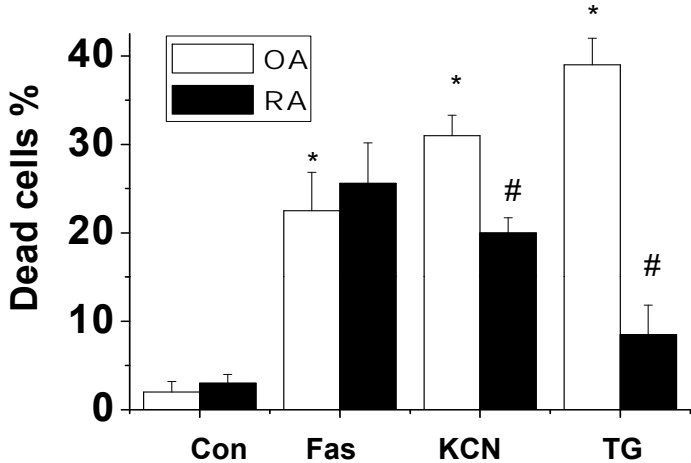

(b)

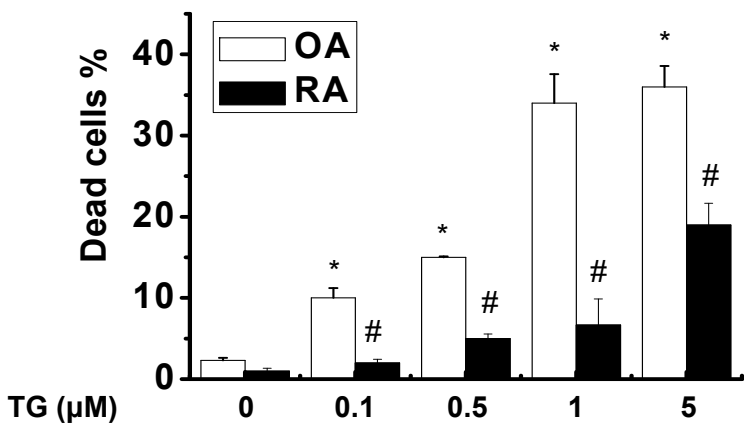

(c)

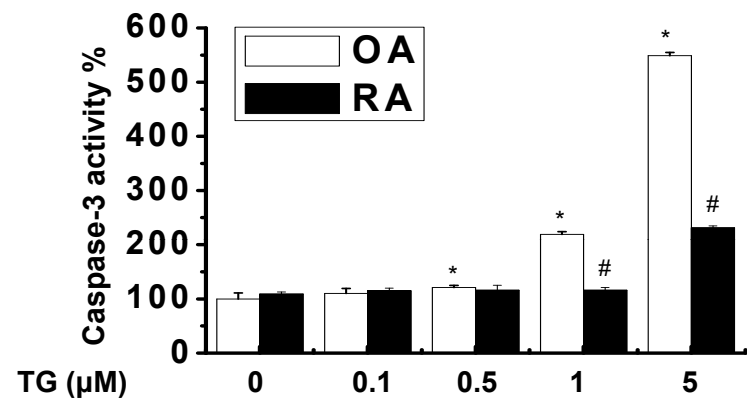

Supplement: MOESM2 [file 9692820]
